# Supplementary material for: Discontinuation and Reinitiation of Dual-Labeled GLP-1 Receptor Agonists Among US Adults With Overweight or Obesity
Source: PubMed Central journal article supplement (PMC11786232; doi:10.1001/jamanetworkopen.2024.57349), 2025-01-31
Supplement: jamanetwopen-e2457349-s002.pdf [file jamanetwopen-e2457349-s002.pdf]

## Data Sharing Statement

Rodriguez. Discontinuation and Reinitiation of Dual-Labeled GLP-1 Receptor Agonists Among US Adults With Overweight or Obesity. *JAMA Netw Open*. Published January 31, 2025.  
doi:10.1001/jamanetworkopen.2024.57349

### Data

**Data available:** No

**Explanation for why data are not available:** Data are not publicly available. Truveta data are available to Truveta subscribers.
